# Supplementary material
Source: Springer Nature journal article supplement (https://www.springermedizin.de/resource/supplementary/12913_2009_1024_MOESM1_ESM.pdf/9536160)
Supplement: MOESM1 [file 9536160]

Screening and informed consent

Baseline and randomisation

**Control group**

(usual care, i.e. regular O&M-training)

5 week follow-up  
(effect evaluation)

8 week follow-up  
(process evaluation)

17 week follow-up  
(effect evaluation)

**Intervention group**

(standardised O&M-training)

5 week follow-up  
(effect evaluation)

8 week follow-up  
(process evaluation)

17 week follow-up  
(effect evaluation)
